# Supplementary material for: Compositional dependence of Co- and Mo-supported beta zeolite for selective one-step hydrotreatment of methyl palmitate to produce bio jet fuel range hydrocarbons
Source: Royal Society of Chemistry journal article supplement (doi:10.1039/d2ra06938e), 2023-01-01
Supplement: d2ra06938e1.pdf [file d2ra06938e1.pdf]

*Supplementary Information for*

**Compositional dependence of Co- and Mo-supported Beta zeolite for  
selective one-step hydrotreatment of methyl palmitate to produce bio jet  
fuel range hydrocarbons**

**Su-Un Lee, Tae-Wan Kim, Kwang-Eun Jeong, Sungjune Lee, Min Cheol Shin and Chul-Ung Kim\***

Chemical & Process Technology Division, Korea Research Institute of Chemical Technology, 141, Gajeong-ro, Yuseong-gu,  
Daejeon 34114, South Korea

Tel.: +82-42-860-7504, Fax: +82-42-860-7590, e-mail: cukim@kriict.re.kr

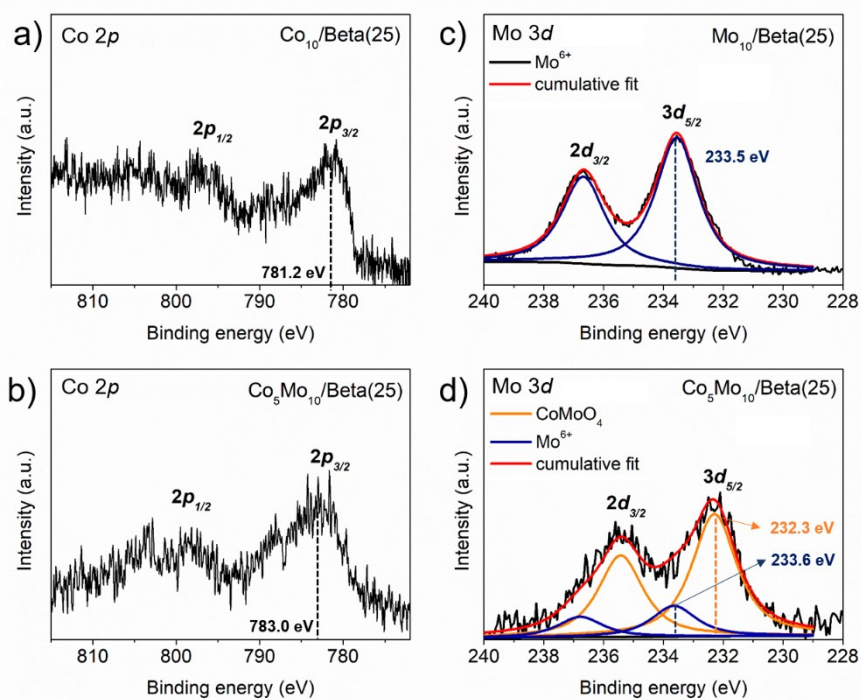

**Fig. S1.** XPS of Co 2p for (a) Co<sub>10</sub>/Beta(25) and (b) Co<sub>5</sub>Mo<sub>10</sub>/Beta(25), and Mo 3d for (c) Mo<sub>10</sub>/Beta(25) and (d) Co<sub>5</sub>Mo<sub>10</sub>/Beta(25). All the samples were obtained after the wet-impregnation and subsequent calcination.

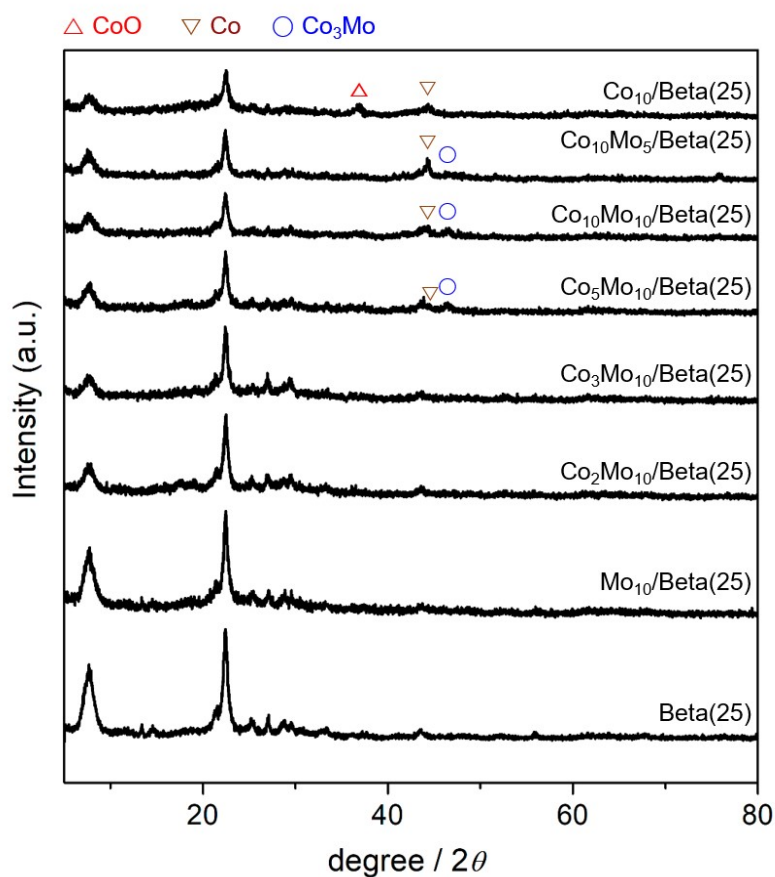

**Fig. S2.** XRD patterns of the Co- or/and Mo-supported Beta(25) and Beta(25) zeolite after the reduction under the same pretreatment condition of the catalytic reaction test. The positions of characteristic peaks are referenced from the JCPDS database (CoO: PDF#04-001-8626, Co: PDF#01-077-7456, Co<sub>3</sub>Mo: PDF#04-004-3529).

**Table S1.** Physical properties of Co- or/and Mo-supported Beta(25) and Beta(25) zeolite after the reduction under the same pretreatment condition of the catalytic reaction test.

| Sample                                      | Surface area (BET) (m <sup>2</sup> /g) |                        |                       | Pore volume (cm <sup>3</sup> /g) |                        |                       |
|---------------------------------------------|----------------------------------------|------------------------|-----------------------|----------------------------------|------------------------|-----------------------|
|                                             | Total <sup>a</sup>                     | Micropore <sup>b</sup> | Mesopore <sup>b</sup> | Total                            | Micropore <sup>b</sup> | Mesopore <sup>b</sup> |
| Co <sub>10</sub> /Beta(25)                  | 452                                    | 312                    | 140                   | 0.51                             | 0.12                   | 0.39                  |
| Co <sub>10</sub> Mo <sub>5</sub> /Beta(25)  | 466                                    | 320                    | 146                   | 0.63                             | 0.13                   | 0.50                  |
| Co <sub>10</sub> Mo <sub>10</sub> /Beta(25) | 449                                    | 312                    | 137                   | 0.54                             | 0.12                   | 0.42                  |
| Co <sub>5</sub> Mo <sub>10</sub> /Beta(25)  | 447                                    | 312                    | 135                   | 0.57                             | 0.12                   | 0.45                  |
| Co <sub>3</sub> Mo <sub>10</sub> /Beta(25)  | 456                                    | 318                    | 138                   | 0.57                             | 0.13                   | 0.44                  |
| Co <sub>2</sub> Mo <sub>10</sub> /Beta(25)  | 444                                    | 296                    | 148                   | 0.62                             | 0.12                   | 0.50                  |
| Mo <sub>10</sub> /Beta(25)                  | 443                                    | 283                    | 150                   | 0.66                             | 0.11                   | 0.55                  |
| Beta(25)                                    | 643                                    | 439                    | 204                   | 0.79                             | 0.18                   | 0.61                  |

<sup>a</sup> Total surface area was determined by N<sub>2</sub> adsorption and calculated by BET method.

<sup>b</sup> Surface area and volume of micropore and mesopore were determined by t-plot method.

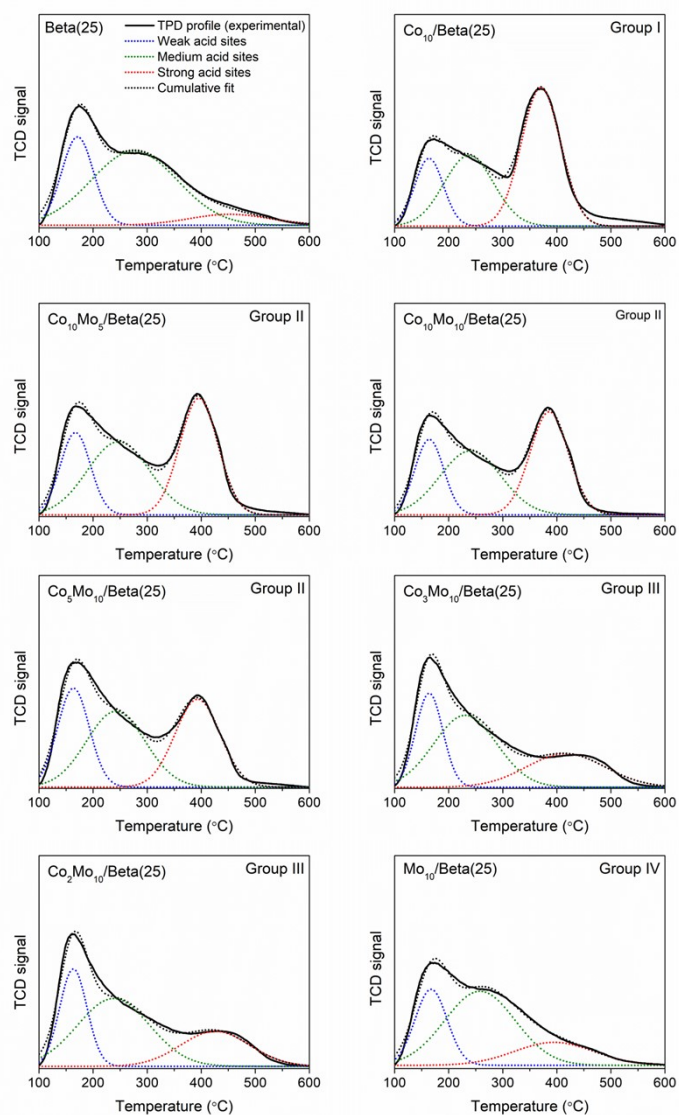

**Fig. S3.** NH<sub>3</sub>-TPD profiles and the corresponding deconvolution results by the Gaussian curve fitting method.

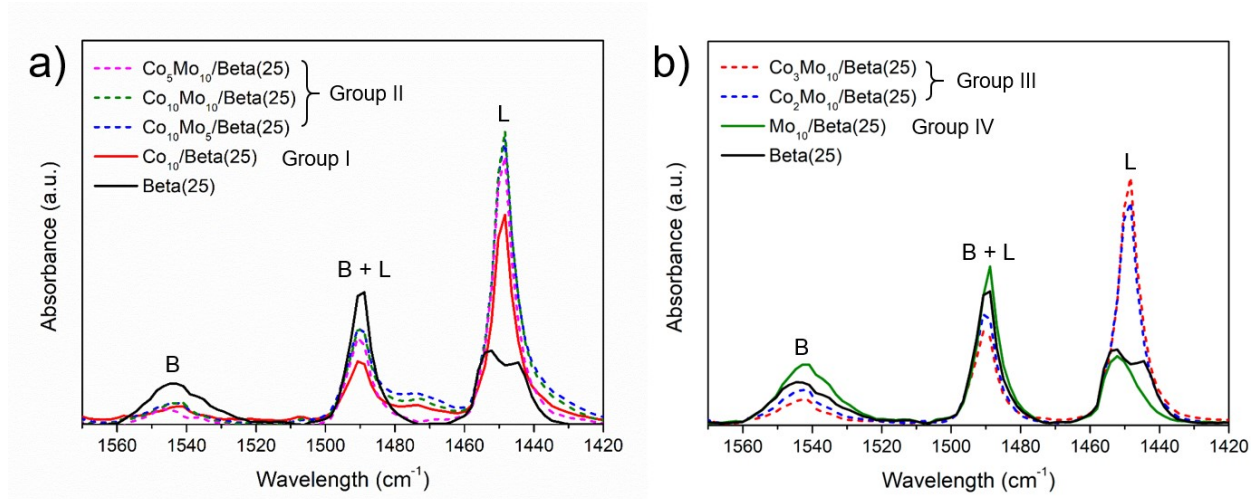

**Fig. S4.** FTIR spectra of adsorbed pyridine of catalysts after the reduction under the same pretreatment condition of the catalytic reaction test; (a)  $\text{Co}_{10}/\text{Beta}(25)$ ,  $\text{Co}_{10}\text{Mo}_5/\text{Beta}(25)$ ,  $\text{Co}_{10}\text{Mo}_{10}/\text{Beta}(25)$ ,  $\text{Co}_5\text{Mo}_{10}/\text{Beta}(25)$ , and  $\text{Beta}(25)$ , and (b)  $\text{Mo}_{10}/\text{Beta}(25)$ ,  $\text{Co}_2\text{Mo}_{10}/\text{Beta}(25)$ ,  $\text{Co}_3\text{Mo}_{10}/\text{Beta}(25)$ , and  $\text{Beta}(25)$ , which are separately classified according to the combination of metal phases.

**Table S2.** Catalytic activities of the zeolite-based catalysts for bio jet fuel range hydrocarbons from FAMEs.

| Catalysts                                                                | Feed                                                                                                                              | Reactor    | T (°C) | P (bar) | Conversion (%) | Selectivity for jet fuel range (%)          | Isomerization (%)                                           | Ref                                                     |
|--------------------------------------------------------------------------|-----------------------------------------------------------------------------------------------------------------------------------|------------|--------|---------|----------------|---------------------------------------------|-------------------------------------------------------------|---------------------------------------------------------|
| Co <sub>5</sub> Mo <sub>10</sub> /Beta(25)                               | Methyl palmitate                                                                                                                  | semi-batch | 280    | 20      | 94.2           | 89.7 wt% (C <sub>8</sub> -C <sub>16</sub> ) | 83.8 (C <sub>8</sub> -C <sub>16</sub> )                     | This work                                               |
| Ni/desilicated meso Y zeolite                                            | Methyl palmitate                                                                                                                  | batch      | 390    | 20      | -              | 64.8 (C <sub>8</sub> -C <sub>16</sub> )     | 19.4 (C <sub>8</sub> -C <sub>16</sub> )                     | <i>Fuel</i> <b>2019</b> , 244, 472.                     |
| 10wt%Ni/Beta zeolite                                                     | Methyl laurate                                                                                                                    | batch      | 280    | 20      | 81.1           | 37.7 (C <sub>11</sub> -C <sub>12</sub> )    | -                                                           | <i>Fuel Process. Technol.</i> <b>2023</b> , 241, 107602 |
| PtNi@hierarchical silicalite-1 zeolite                                   | Methyl stearate                                                                                                                   | fixed-bed  | 360    | 30      | 100            | 45 (C <sub>9</sub> -C <sub>15</sub> )       | -                                                           | <i>Ind. Eng. Chem. Res.</i> <b>2020</b> , 59, 8601.     |
| 10 wt% Ni/HZSM-5 (Si/Al = 25)                                            | Methyl oleate C <sub>18:1</sub> (99.0%), methyl octadecanoate C <sub>18:0</sub> (0.8%), methyl linoleate C <sub>18:2</sub> (0.2%) | fixed-bed  | 280    | 8       | 85.1           | 32.5 (C <sub>8</sub> -C <sub>16</sub> )     | 35.4 mol% (C <sub>8</sub> -C <sub>16</sub> )                | <i>Catal. Today.</i> <b>2016</b> , 259, 266.            |
| Ni/meso Y zeolite                                                        | Microalgae (FAMEs, C16:1 (35.9%), C16:0 (30.0%), C14:0 (10.7%), C18:1(8.5%))                                                      | fixed-bed  | 275    | 20      | 91.5           | 56.2 (C <sub>8</sub> -C <sub>16</sub> )     | 46.4 (C <sub>5</sub> -C <sub>16</sub> , in liquid products) | <i>Int. J. Hydrog. Energy.</i> <b>2019</b> , 44, 11765. |
| 4% H <sub>3</sub> PW <sub>12</sub> O <sub>4</sub> -10% Ni/meso Y zeolite | Microalgae (FAMEs, including C16:1 (35.9%), C16:0 (30.0%), C14:0 (10.7%), C18:1(8.5%))                                            | fixed-bed  | 255    | 20      | -              | 63.1 (C <sub>8</sub> -C <sub>16</sub> )     | 20.5 (C <sub>5</sub> -C <sub>16</sub> , in liquid products) | <i>Fuel</i> <b>2019</b> , 245, 384                      |
| Ce/Beta zeolite                                                          | Algae oil                                                                                                                         | batch      | 400    | 27.5    | 98             | 85 (C <sub>10</sub> -C <sub>14</sub> )      | -                                                           | <i>RSC advances.</i> , <b>2016</b> , 6, 14626.          |

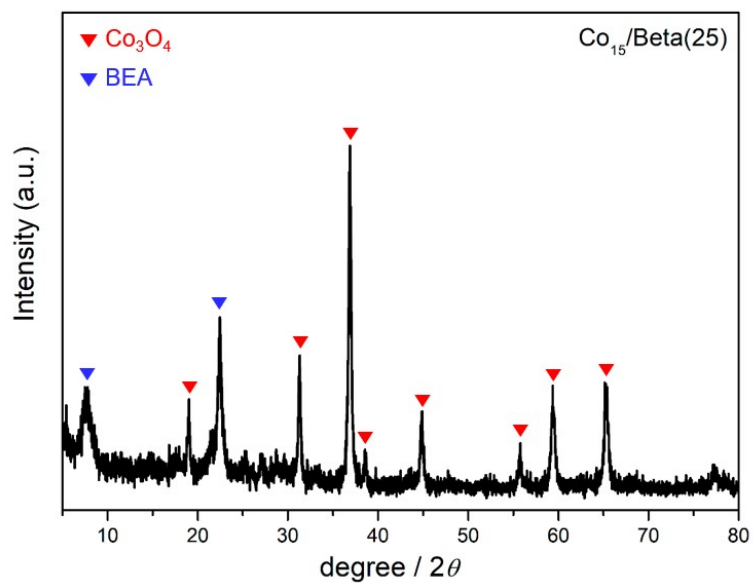

**Fig. S5.** XRD patterns of  $\text{Co}_{15}/\text{Beta}(25)$  obtained by the wet-impregnation and subsequent calcination. The positions of characteristic peaks are referenced from the JCPDS database (BEA:01-074-8795,  $\text{Co}_3\text{O}_4$ :00-042-1467).



**Table S3.** Acidic properties of Co<sub>15</sub>/Beta(25) estimated by NH<sub>3</sub>-TPD profiles and FTIR spectra of adsorbed pyridine, and their corresponding crystalline phase confirmed by XRD. Co<sub>15</sub>/Beta(25) was reduced under the same pretreatment condition of the catalytic reaction test.

| Sample                     | Metal phase                    | NH <sub>3</sub> -TPD           |                  |                                |                  |                                |                  | FTIR of adsorbed pyridine |                         |                         |                  |
|----------------------------|--------------------------------|--------------------------------|------------------|--------------------------------|------------------|--------------------------------|------------------|---------------------------|-------------------------|-------------------------|------------------|
|                            |                                | Strong acid sites <sup>a</sup> |                  | Medium acid sites <sup>a</sup> |                  | Strong acid sites <sup>a</sup> |                  | Total acid sites (mmol/g) | B <sup>b</sup> (mmol/g) | L <sup>b</sup> (mmol/g) | B/L <sup>b</sup> |
|                            |                                | T (°C)                         | Density (mmol/g) | T (°C)                         | Density (mmol/g) | T (°C)                         | Density (mmol/g) |                           |                         |                         |                  |
| Co <sub>15</sub> /Beta(25) | Co <sub>3</sub> O <sub>4</sub> | 164                            | 0.20             | 233                            | 0.33             | 359                            | 0.60             | 1.13                      | 0.05                    | 0.05                    | 1.08             |

<sup>a</sup> Peak temperature and the corresponding amounts of acid sites calculated from the deconvolution results of NH<sub>3</sub>-TPD profiles by the bian curve fitting method (Fig. S2)

<sup>b</sup> Quantity of Brønsted (B) and Lewis (L) acid sites determined by multiplying the B/L ratio from FTIR spectra of adsorbed pyridine and the total acid sites concentration from NH<sub>3</sub>-TPD profiles.

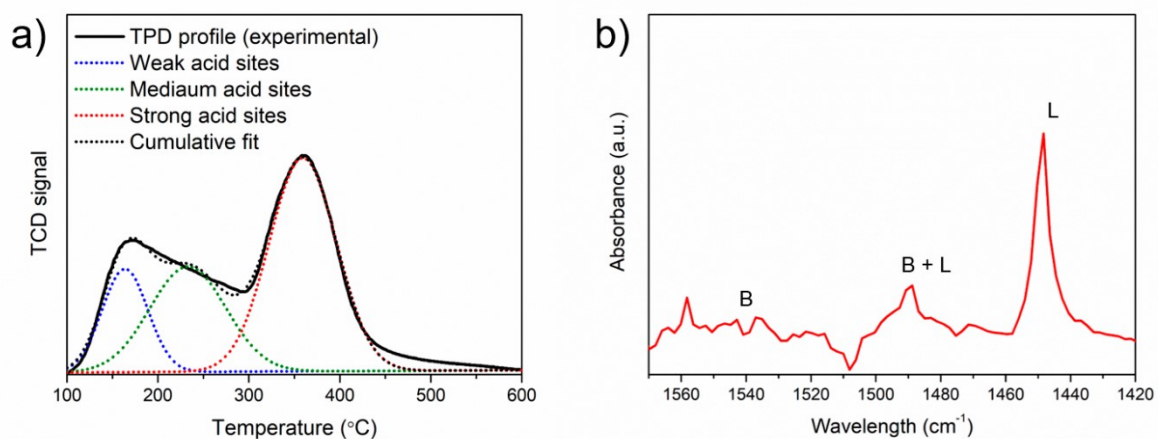

**Fig. S6.** (a) NH<sub>3</sub>-TPD profiles and the corresponding deconvolution results by the Gaussian curve fitting method and (b) FTIR spectra of adsorbed pyridine of Co<sub>15</sub>/Beta(25) after the reduction under the same pretreatment condition of the catalytic reaction test

**Table S4.** Catalytic activity of methyl palmitate over the Co<sub>15</sub>/Beta(25) zeolite catalyst.

| Catalyst                   | Conv. (%) | Gas product | Organic liquid product |                                |                                 |                                  |                                                |               | Yield of jet fuel range hydrocarbons (C <sub>8</sub> -C <sub>16</sub> , %) | n-C <sub>16</sub> / (n-C <sub>15</sub> + n-C <sub>16</sub> ) | Isomer ratio in C <sub>8</sub> -C <sub>16</sub> (%) |
|----------------------------|-----------|-------------|------------------------|--------------------------------|---------------------------------|----------------------------------|------------------------------------------------|---------------|----------------------------------------------------------------------------|--------------------------------------------------------------|-----------------------------------------------------|
|                            |           | Yield (%)   | Yield (%)              | Selectivity (wt%)              |                                 |                                  |                                                |               |                                                                            |                                                              |                                                     |
|                            |           |             |                        | C <sub>5</sub> -C <sub>7</sub> | C <sub>8</sub> -C <sub>16</sub> | C <sub>17</sub> -C <sub>18</sub> | C <sub>32</sub> H <sub>64</sub> O <sub>2</sub> | Palmitic acid |                                                                            |                                                              |                                                     |
| Co <sub>15</sub> /Beta(25) | 100       | 27.3        | 72.7                   | 10.4                           | 89.6                            | 0                                | 0                                              | 0             | 65.1                                                                       | 0.74                                                         | 77.7                                                |
